# Supplementary material for: Fungal Colonization of Weathered Radiata Pine Surfaces Protected with Inorganic Nanoparticles and Coatings
Source: MDPI journal article supplement (doi:10.3390/f14071338), 2023-06-29
Supplement: s1 [file s1]

Archive with 4 entries (4 files):
- Table S1.pdf
- Table S2.pdf
- Table S3.pdf
- Table S4.pdf
