# Supplementary material for: Fungal Colonization of Weathered Radiata Pine Surfaces Protected with Inorganic Nanoparticles and Coatings
Source: MDPI journal article supplement (doi:10.3390/f14071338), 2023-06-29
Supplement: s1 [file s1 › Table S1.pdf]

Table S1: Distribution of nanoparticle and coating treatments.

| Sample number | Coating type | Nanoparticle type               |
|---------------|--------------|---------------------------------|
| 1             | B1           | TiO <sub>2</sub> _RUTILE50 nm   |
| 2             | B1           | TiO <sub>2</sub> _RUTILE100 nm  |
| 3             | B1           | TiO <sub>2</sub> _ANATASE40 nm  |
| 4             | B1           | TiO <sub>2</sub> _ANATASE100 nm |
| 5             | B1           | ZnO_35-45 nm                    |
| 6             | B1           | ZnO_80-200 nm                   |
| 7             | B1           | WITHOUT NANOPARTICLES           |
| 8             | B2           | TiO <sub>2</sub> _RUTILE50 nm   |
| 9             | B2           | TiO <sub>2</sub> _RUTILE100 nm  |
| 10            | B2           | TiO <sub>2</sub> _ANATASE40 nm  |
| 11            | B2           | TiO <sub>2</sub> _ANATASE100 nm |
| 12            | B2           | ZnO_35-45 nm                    |
| 13            | B2           | ZnO_80-200 nm                   |
| 14            | B2           | WITHOUT NANOPARTICLES           |
| 15            | B3           | TiO <sub>2</sub> _RUTILE50 nm   |
| 16            | B3           | TiO <sub>2</sub> _RUTILE100 nm  |
| 17            | B3           | TiO <sub>2</sub> _ANATASE40 nm  |
| 18            | B3           | TiO <sub>2</sub> _ANATASE100 nm |
| 19            | B3           | ZnO_35-45 nm                    |
| 20            | B3           | ZnO_80-200 nm                   |
| 21            | B3           | WITHOUT NANOPARTICLES           |
| 22            | B4           | TiO <sub>2</sub> _RUTILE50 nm   |
| 23            | B4           | TiO <sub>2</sub> _RUTILE100 nm  |
| 24            | B4           | TiO <sub>2</sub> _ANATASE40 nm  |
| 25            | B4           | TiO <sub>2</sub> _ANATASE100 nm |
| 26            | B4           | ZnO_35-45 nm                    |
| 27            | B4           | ZnO_80-200 nm                   |
| 28            | B4           | WITHOUT NANOPARTICLES           |
| 29            | B5           | TiO <sub>2</sub> _RUTILE50 nm   |
| 30            | B5           | TiO <sub>2</sub> _RUTILE100 nm  |
| 31            | B5           | TiO <sub>2</sub> _ANATASE40 nm  |
| 32            | B5           | TiO <sub>2</sub> _ANATASE100 nm |
| 33            | B5           | ZnO_35-45 nm                    |
| 34            | B5           | ZnO_80-200 nm                   |
| 35            | B5           | WITHOUT NANOPARTICLES           |
| 36            | B6           | TiO <sub>2</sub> _RUTILE50 nm   |
| 37            | B6           | TiO <sub>2</sub> _RUTILE100 nm  |
| 38            | B6           | TiO <sub>2</sub> _ANATASE40 nm  |
| 39            | B6           | TiO <sub>2</sub> _ANATASE100 nm |
| 40            | B6           | ZnO_35-45 nm                    |
| 41            | B6           | ZnO_80-200 nm                   |
| 42            | B6           | S/B                             |
| 43            | B7           | TiO <sub>2</sub> _RUTILE50 nm   |
| 44            | B7           | TiO <sub>2</sub> _RUTILE100 nm  |
| 45            | B7           | TiO <sub>2</sub> _ANATASE40 nm  |
| 46            | B7           | TiO <sub>2</sub> _ANATASE100 nm |
| 47            | B7           | ZnO_35-45 nm                    |
| 48            | B7           | ZnO_80-200 nm                   |
| 49            | B7           | WITHOUT NANOPARTICLES           |
| 50            | B8           | TiO <sub>2</sub> _RUTILE50 nm   |
| 51            | B8           | TiO <sub>2</sub> _RUTILE100 nm  |
| 52            | B8           | TiO <sub>2</sub> _ANATASE40 nm  |
| 53            | B8           | TiO <sub>2</sub> _ANATASE100 nm |
| 54            | B8           | ZnO_35-45 nm                    |
| 55            | B8           | ZnO_80-200 nm                   |
| 56            | B8           | WITHOUT NANOPARTICLES           |
| 57            | B9           | TiO <sub>2</sub> _RUTILE50 nm   |

|     |     |                       |
|-----|-----|-----------------------|
| 58  | B9  | TiO2_RUTILE100 nm     |
| 59  | B9  | TiO2_ANATASE40 nm     |
| 60  | B9  | TiO2_ANATASE100 nm    |
| 61  | B9  | ZnO_35-45 nm          |
| 62  | B9  | ZnO_80-200 nm         |
| 63  | B9  | WITHOUT NANOPARTICLES |
| 64  | S/B | TiO2_RUTILE50 nm      |
| 65  | S/B | TiO2_RUTILE100 nm     |
| 66  | S/B | TiO2_ANATASE40 nm     |
| 67  | S/B | TiO2_ANATASE100 nm    |
| 68  | S/B | ZnO_35-45 nm          |
| 69  | S/B | ZnO_80-200 nm         |
| 70  | S/B | WITHOUT NANOPARTICLES |
| 71  | B1  | TiO2_RUTILE50 nm      |
| 72  | B1  | TiO2_RUTILE100 nm     |
| 73  | B1  | TiO2_ANATASE40 nm     |
| 74  | B1  | TiO2_ANATASE100 nm    |
| 75  | B1  | ZnO_35-45 nm          |
| 76  | B1  | ZnO_80-200 nm         |
| 77  | B1  | WITHOUT NANOPARTICLES |
| 78  | B2  | TiO2_RUTILE50 nm      |
| 79  | B2  | TiO2_RUTILE100 nm     |
| 80  | B2  | TiO2_ANATASE40 nm     |
| 81  | B2  | TiO2_ANATASE100 nm    |
| 82  | B2  | ZnO_35-45 nm          |
| 83  | B2  | ZnO_80-200 nm         |
| 84  | B2  | WITHOUT NANOPARTICLES |
| 85  | B3  | TiO2_RUTILE50 nm      |
| 86  | B3  | TiO2_RUTILE100 nm     |
| 87  | B3  | TiO2_ANATASE40 nm     |
| 88  | B3  | TiO2_ANATASE100 nm    |
| 89  | B3  | ZnO_35-45 nm          |
| 90  | B3  | ZnO_80-200 nm         |
| 91  | B3  | WITHOUT NANOPARTICLES |
| 92  | B4  | TiO2_RUTILE50 nm      |
| 93  | B4  | TiO2_RUTILE100 nm     |
| 94  | B4  | TiO2_ANATASE40 nm     |
| 95  | B4  | TiO2_ANATASE100 nm    |
| 96  | B4  | ZnO_35-45 nm          |
| 97  | B4  | ZnO_80-200 nm         |
| 98  | B4  | WITHOUT NANOPARTICLES |
| 99  | B5  | TiO2_RUTILE50 nm      |
| 100 | B5  | TiO2_RUTILE100 nm     |
| 101 | B5  | TiO2_ANATASE40 nm     |
| 102 | B5  | TiO2_ANATASE100 nm    |
| 103 | B5  | ZnO_35-45 nm          |
| 104 | B5  | ZnO_80-200 nm         |
| 105 | B5  | WITHOUT NANOPARTICLES |
| 106 | B6  | TiO2_RUTILE50 nm      |
| 107 | B6  | TiO2_RUTILE100 nm     |
| 108 | B6  | TiO2_ANATASE40 nm     |
| 109 | B6  | TiO2_ANATASE100 nm    |
| 110 | B6  | ZnO_35-45 nm          |
| 111 | B6  | ZnO_80-200 nm         |
| 112 | B6  | WITHOUT NANOPARTICLES |
| 113 | B7  | TiO2_RUTILE50 nm      |
| 114 | B7  | TiO2_RUTILE100 nm     |
| 115 | B7  | TiO2_ANATASE40 nm     |
| 116 | B7  | TiO2_ANATASE100 nm    |
| 117 | B7  | ZnO_35-45 nm          |
| 118 | B7  | ZnO_80-200 nm         |
| 119 | B7  | WITHOUT NANOPARTICLES |

|     |     |                       |
|-----|-----|-----------------------|
| 120 | B8  | TiO2_RUTILE50 nm      |
| 121 | B8  | TiO2_RUTILE100 nm     |
| 122 | B8  | TiO2_ANATASE40 nm     |
| 123 | B8  | TiO2_ANATASE100 nm    |
| 124 | B8  | ZnO_35-45 nm          |
| 125 | B8  | ZnO_80-200 nm         |
| 126 | B8  | WITHOUT NANOPARTICLES |
| 127 | B9  | TiO2_RUTILE50 nm      |
| 128 | B9  | TiO2_RUTILE100 nm     |
| 129 | B9  | TiO2_ANATASE40 nm     |
| 130 | B9  | TiO2_ANATASE100 nm    |
| 131 | B9  | ZnO_35-45 nm          |
| 132 | B9  | ZnO_80-200 nm         |
| 133 | B9  | WITHOUT NANOPARTICLES |
| 134 | S/B | TiO2_RUTILE50 nm      |
| 135 | S/B | TiO2_RUTILE100 nm     |
| 136 | S/B | TiO2_ANATASE40 nm     |
| 137 | S/B | TiO2_ANATASE100 nm    |
| 138 | S/B | ZnO_35-45 nm          |
| 139 | S/B | ZnO_80-200 nm         |
| 140 | S/B | WITHOUT NANOPARTICLES |
| 141 | B1  | TiO2_RUTILE50 nm      |
| 142 | B1  | TiO2_RUTILE100 nm     |
| 143 | B1  | TiO2_ANATASE40 nm     |
| 144 | B1  | TiO2_ANATASE100 nm    |
| 145 | B1  | ZnO_35-45 nm          |
| 146 | B1  | ZnO_80-200 nm         |
| 147 | B1  | S/B                   |
| 148 | B2  | TiO2_RUTILE50 nm      |
| 149 | B2  | TiO2_RUTILE100 nm     |
| 150 | B2  | TiO2_ANATASE40 nm     |
| 151 | B2  | TiO2_ANATASE100 nm    |
| 152 | B2  | ZnO_35-45 nm          |
| 153 | B2  | ZnO_80-200 nm         |
| 154 | B2  | WITHOUT NANOPARTICLES |
| 155 | B3  | TiO2_RUTILE50 nm      |
| 156 | B3  | TiO2_RUTILE100 nm     |
| 157 | B3  | TiO2_ANATASE40 nm     |
| 158 | B3  | TiO2_ANATASE100 nm    |
| 159 | B3  | ZnO_35-45 nm          |
| 160 | B3  | ZnO_80-200 nm         |
| 161 | B3  | WITHOUT NANOPARTICLES |
| 162 | B4  | TiO2_RUTILE50 nm      |
| 163 | B4  | TiO2_RUTILE100 nm     |
| 164 | B4  | TiO2_ANATASE40 nm     |
| 165 | B4  | TiO2_ANATASE100 nm    |
| 166 | B4  | ZnO_35-45 nm          |
| 167 | B4  | ZnO_80-200 nm         |
| 168 | B4  | WITHOUT NANOPARTICLES |
| 169 | B5  | TiO2_RUTILE50 nm      |
| 170 | B5  | TiO2_RUTILE100 nm     |
| 171 | B5  | TiO2_ANATASE40 nm     |
| 172 | B5  | TiO2_ANATASE100 nm    |
| 173 | B5  | ZnO_35-45 nm          |
| 174 | B5  | ZnO_80-200 nm         |
| 175 | B5  | WITHOUT NANOPARTICLES |
| 176 | B6  | TiO2_RUTILE50 nm      |
| 177 | B6  | TiO2_RUTILE100 nm     |
| 178 | B6  | TiO2_ANATASE40 nm     |
| 179 | B6  | TiO2_ANATASE100 nm    |
| 180 | B6  | ZnO_35-45 nm          |
| 181 | B6  | ZnO_80-200 nm         |

|     |     |                       |
|-----|-----|-----------------------|
| 182 | B6  | WITHOUT NANOPARTICLES |
| 183 | B7  | TiO2_RUTILE50 nm      |
| 184 | B7  | TiO2_RUTILE100 nm     |
| 185 | B7  | TiO2_ANATASE40 nm     |
| 186 | B7  | TiO2_ANATASE100 nm    |
| 187 | B7  | ZnO_35-45 nm          |
| 188 | B7  | ZnO_80-200 nm         |
| 189 | B7  | WITHOUT NANOPARTICLES |
| 190 | B8  | TiO2_RUTILE50 nm      |
| 191 | B8  | TiO2_RUTILE100 nm     |
| 192 | B8  | TiO2_ANATASE40 nm     |
| 193 | B8  | TiO2_ANATASE100 nm    |
| 194 | B8  | ZnO_35-45 nm          |
| 195 | B8  | ZnO_80-200 nm         |
| 196 | B8  | WITHOUT NANOPARTICLES |
| 197 | B9  | TiO2_RUTILE50 nm      |
| 198 | B9  | TiO2_RUTILE100 nm     |
| 199 | B9  | TiO2_ANATASE40 nm     |
| 200 | B9  | TiO2_ANATASE100 nm    |
| 201 | B9  | ZnO_35-45 nm          |
| 202 | B9  | ZnO_80-200 nm         |
| 203 | B9  | WITHOUT NANOPARTICLES |
| 204 | S/B | TiO2_RUTILE50 nm      |
| 205 | S/B | TiO2_RUTILE100 nm     |
| 206 | S/B | TiO2_ANATASE40 nm     |
| 207 | S/B | TiO2_ANATASE100 nm    |
| 208 | S/B | ZnO_35-45 nm          |
| 209 | S/B | ZnO_80-200 nm         |
| 210 | S/B | WITHOUT NANOPARTICLES |
