# Supplementary material for: Fungal Colonization of Weathered Radiata Pine Surfaces Protected with Inorganic Nanoparticles and Coatings
Source: MDPI journal article supplement (doi:10.3390/f14071338), 2023-06-29
Supplement: s1 [file s1 › Table S2.pdf]

Table S2: Sequences accession number of fungi isolated from wood samples

| Specimen<br>voucher | Isolation source                                                                   | Organism                                                       | Sequence Accession<br>number at GeneBank |
|---------------------|------------------------------------------------------------------------------------|----------------------------------------------------------------|------------------------------------------|
| 0_141               | Radiata pine surface treated<br>with titanium dioxide rutile<br>50 nm and coating  | <i>Cladosporium<br/>delicatulum</i>                            | OR069535                                 |
| 1_1_24              | Radiata pine surface treated<br>with titanium dioxide<br>anatase 40 nm and coating | <i>Aureobasidium<br/>pullulans</i>                             | OR069536                                 |
| 1_10_67             | Radiata pine surface treated<br>with titanium dioxide<br>anatase 100 nm            | <i>Aureobasidium<br/>pullulans<br/>Trametes<br/>versicolor</i> | OR069537                                 |
| 1_11_70             | Radiata pine surface                                                               |                                                                | OR069538                                 |
| 1_12_98             | Radiata pine surface with<br>coating                                               | <i>Coniochaeta</i> sp.                                         | OR069539                                 |
| 1_13_98             | Radiata pine surface with<br>coating                                               | <i>Penicillium<br/>citreonigrum</i>                            | OR069540                                 |
| 1_14_101            | Radiata pine surface treated<br>with titanium dioxide<br>anatase 40 nm and coating | <i>Ramularia</i> sp.                                           | OR069541                                 |
| 1_143               | Radiata pine surface treated<br>with titanium dioxide<br>anatase 40 nm and coating | <i>Phanerochaetaceae</i><br>sp.                                | OR069542                                 |
| 1_15_101            | Radiata pine surface treated<br>with titanium dioxide<br>anatase 40 nm and coating | <i>Sydowia polyspora</i>                                       | OR069543                                 |
| 1_16_119            | Radiata pine surface with<br>coating                                               | <i>Aureobasidium<br/>pullulans</i>                             | OR069544                                 |
| 1_17_127            | Radiata pine surface treated<br>with titanium dioxide rutile<br>50 nm and coating  | <i>Sydowia polyspora</i>                                       | OR069545                                 |
| 1_18_134            | Radiata pine surface treated<br>with titanium dioxide rutile<br>50 nm              | <i>Sistotrema<br/>brinkmannii</i>                              | OR069546                                 |
| 1_19_135            | Radiata pine surface treated<br>with titanium dioxide rutile<br>100 nm             | <i>Sydowia polyspora</i>                                       | OR069547                                 |
| 1_2_42              | Radiata pine surface with<br>coating                                               | Hormonema sp.                                                  | OR069548                                 |
| 1_20_136            | Radiata pine surface treated<br>with titanium dioxide<br>anatase 40 nm             | <i>Cladosporium</i> sp.                                        | OR069549                                 |

|          |                                                                              |                                     |          |
|----------|------------------------------------------------------------------------------|-------------------------------------|----------|
| 1_21_137 | Radiata pine surface treated with titanium dioxide anatase 100 nm            | <i>Alternaria</i> sp.               | OR069550 |
| 1_23_138 | Radiata pine surface treated with zinc oxide 35-45 nm                        | <i>Aureobasidium pullulans</i>      | OR069551 |
| 1_24_138 | Radiata pine surface treated with zinc oxide 35-45 nm                        | <i>Sydowia polyspora</i>            | OR069552 |
| 1_25_139 | Radiata pine surface treated with zinc oxide 80-200 nm                       | <i>Aureobasidium pullulans</i>      | OR069553 |
| 1_27_140 | Radiata pine surface                                                         | <i>Cladosporium cladosporioides</i> | OR069554 |
| 1_3_54   | Radiata pine surface treated with zinc oxide 35-45 nm and coating            | <i>Aureobasidium pullulans</i>      | OR069555 |
| 1_4_64   | Radiata pine surface treated with titanium dioxide rutile 50 nm              | <i>Penicillium raistrickii</i>      | OR069556 |
| 1_5_64   | Radiata pine surface treated with titanium dioxide rutile 50 nm              | <i>Penicillium glabrum</i>          | OR069557 |
| 1_6_65   | Radiata pine surface treated with titanium dioxide rutile 100 nm             | <i>Sydowia polyspora</i>            | OR069558 |
| 1_7_65   | Radiata pine surface treated with titanium dioxide rutile 100 nm             | <i>Aureobasidium pullulans</i>      | OR069559 |
| 1_8_66   | Radiata pine surface treated with titanium dioxide anatase 40 nm             | <i>Junghuhnia nitida</i>            | OR069560 |
| 1_9_67   | Radiata pine surface treated with titanium dioxide anatase 100 nm            | <i>Sydowia polyspora</i>            | OR069561 |
| 10_150   | Radiata pine surface treated with titanium dioxide anatase 40 nm and coating | <i>Coniochaeta</i> sp.              | OR069562 |
| 100_208  | Radiata pine surface treated with zinc oxide 35-45 nm                        | <i>Epicoccum nigrum</i>             | OR069563 |
| 101_208  | Radiata pine surface treated with zinc oxide 35-45 nm                        | <i>Cytospora eucalypticola</i>      | OR069564 |
| 102_209  | Radiata pine surface treated with zinc oxide 80-200 nm                       | <i>Aureobasidium pullulans</i>      | OR069565 |
| 103_209  | Radiata pine surface treated with zinc oxide 80-200 nm                       | <i>Aureobasidium</i> sp.            | OR069566 |
| 105_209  | Radiata pine surface treated with zinc oxide 80-200 nm                       | <i>Sydowia polyspora</i>            | OR069567 |
| 106_209  | Radiata pine surface treated with zinc oxide 80-200 nm                       | <i>Byssomerulius corium</i>         | OR069568 |

|         |                                                                              |                                     |          |
|---------|------------------------------------------------------------------------------|-------------------------------------|----------|
| 107_209 | Radiata pine surface treated with zinc oxide 80-200 nm                       | <i>Cladosporium</i> sp.             | OR069569 |
| 109_210 | Radiata pine surface                                                         | <i>Hyphodermella</i> sp.            | OR069570 |
| 11_150  | Radiata pine surface treated with titanium dioxide anatase 40 nm and coating | <i>Aureobasidium</i> sp.            | OR069571 |
| 111_210 | Radiata pine surface                                                         | <i>Aureobasidium</i> sp.            | OR069572 |
| 112_210 | Radiata pine surface                                                         | <i>Cladosporium</i> sp.             | OR069573 |
| 114_210 | Radiata pine surface                                                         | <i>Aureobasidium pullulans</i>      | OR069574 |
| 12_150  | Radiata pine surface treated with titanium dioxide anatase 40 nm and coating | <i>Alternaria alternata</i>         | OR069575 |
| 14_152  | Radiata pine surface treated with zinc oxide 35-45 nm and coating            | <i>Aureobasidium</i> sp.            | OR069576 |
| 15_153  | Radiata pine surface treated with zinc oxide 80-200 nm and coating           | <i>Cladosporium cladosporioides</i> | OR069577 |
| 16_153  | Radiata pine surface treated with zinc oxide 80-200 nm and coating           | <i>Cladosporium allicinum</i>       | OR069578 |
| 17_153  | Radiata pine surface treated with zinc oxide 80-200 nm and coating           | <i>Aureobasidium pullulans</i>      | OR069579 |
| 19_155  | Radiata pine surface treated with titanium dioxide rutile 50 nm and coating  | <i>Epicoccum nigrum</i>             | OR069580 |
| 2_148   | Radiata pine surface treated with titanium dioxide rutile 50 nm and coating  | <i>Alternaria</i> sp.               | OR069581 |
| 21_155  | Radiata pine surface treated with titanium dioxide rutile 50 nm and coating  | <i>Botrytis cinerea</i>             | OR069582 |
| 23_155  | Radiata pine surface treated with titanium dioxide rutile 50 nm and coating  | <i>Aureobasidium pullulans</i>      | OR069583 |
| 25_156  | Radiata pine surface treated with titanium dioxide rutile 100 nm             | <i>Penicillium corylophilum</i>     | OR069584 |
| 27_158  | Radiata pine surface treated with titanium dioxide anatase 40 nm and coating | <i>Clypeosphaeria</i> sp.           | OR069585 |
| 28_159  | Radiata pine surface treated with zinc oxide 35-45 nm and coating            | <i>Aureobasidium pullulans</i>      | OR069586 |

|        |                                                                              |                                     |          |
|--------|------------------------------------------------------------------------------|-------------------------------------|----------|
| 29_160 | Radiata pine surface treated with zinc oxide 80-200 nm and coating           | <i>Phlebia aurea</i>                | OR069587 |
| 30_160 | Radiata pine surface treated with zinc oxide 80-200 nm and coating           | <i>Phlebia subfascicularis</i>      | OR069588 |
| 31_157 | Radiata pine surface treated with titanium dioxide anatase 40 nm and coating | <i>Cladosporium cladosporioides</i> | OR069589 |
| 32_157 | Radiata pine surface treated with titanium dioxide anatase 40 nm and coating | <i>Trechispora nivea</i>            | OR069590 |
| 33_161 | Radiata pine surface with coating                                            | <i>Terana caerulea</i>              | OR069591 |
| 34_162 | Radiata pine surface treated with titanium dioxide rutile 50 nm and coating  | <i>Cladosporium ramotenellum</i>    | OR069592 |
| 35_164 | Radiata pine surface treated with titanium dioxide anatase 40 nm and coating | <i>Cladosporium</i> sp.             | OR069593 |
| 36_164 | Radiata pine surface treated with titanium dioxide anatase 40 nm and coating | <i>Botrytis cinerea</i>             | OR069594 |
| 37_166 | Radiata pine surface treated with zinc oxide 35-45 nm and coating            | <i>Sydowia polyspora</i>            | OR069595 |
| 41_171 | Radiata pine surface treated with titanium dioxide anatase 40 nm and coating | <i>Sydowia polyspora</i>            | OR069596 |
| 42_172 | Radiata pine surface treated with titanium dioxide anatase 40 nm and coating | <i>Stereum hirsutum</i>             | OR069597 |
| 43_170 | Radiata pine surface treated with titanium dioxide rutile 100 nm             | <i>Aureobasidium melanogenum</i>    | OR069598 |
| 44_175 | Radiata pine surface with coating                                            | <i>Aureobasidium pullulans</i>      | OR069599 |
| 45_170 | Radiata pine surface treated with titanium dioxide rutile 100 nm             | <i>Alternaria</i> sp.               | OR069600 |
| 46_181 | Radiata pine surface treated with zinc oxide 80-200 nm and coating           | <i>Stereum hirsutum</i>             | OR069601 |
| 47_183 | Radiata pine surface treated with titanium dioxide rutile 50 nm and coating  | <i>Hormonema</i> sp.                | OR069602 |

|        |                                                                              |                                |          |
|--------|------------------------------------------------------------------------------|--------------------------------|----------|
| 48_184 | Radiata pine surface treated with titanium dioxide rutile 100 nm             | <i>Aureobasidium</i> sp.       | OR069603 |
| 49_186 | Radiata pine surface treated with titanium dioxide anatase 40 nm and coating | <i>Aureobasidium</i> sp.       | OR069604 |
| 5_148  | Radiata pine surface treated with titanium dioxide rutile 50 nm and coating  | <i>Cladosporium herbarum</i>   | OR069605 |
| 50_190 | Radiata pine surface treated with titanium dioxide rutile 50 nm and coating  | <i>Sydowia polyspora</i>       | OR069606 |
| 51_192 | Radiata pine surface treated with titanium dioxide anatase 40 nm and coating | <i>Stereum sanguinolentum</i>  | OR069607 |
| 53_193 | Radiata pine surface treated with titanium dioxide anatase 40 nm and coating | <i>Coniochaeta</i> sp.         | OR069608 |
| 54_193 | Radiata pine surface treated with titanium dioxide anatase 40 nm and coating | <i>Aureobasidium pullulans</i> | OR069609 |
| 55_195 | Radiata pine surface treated with zinc oxide 80-200 nm and coating           | <i>Cladosporium</i> sp.        | OR069610 |
| 56_197 | Radiata pine surface treated with titanium dioxide rutile 50 nm and coating  | <i>Aureobasidium pullulans</i> | OR069611 |
| 57_198 | Radiata pine surface treated with titanium dioxide rutile 100 nm             | <i>Cladosporium</i> sp.        | OR069612 |
| 58_198 | Radiata pine surface treated with titanium dioxide rutile 100 nm             | <i>Bjerkandera adusta</i>      | OR069613 |
| 59_198 | Radiata pine surface treated with titanium dioxide rutile 100 nm             | <i>Botrytis cinerea</i>        | OR069614 |
| 6_149  | Radiata pine surface treated with titanium dioxide rutile 100 nm             | <i>Aureobasidium pullulans</i> | OR069615 |
| 62_198 | Radiata pine surface treated with titanium dioxide rutile 100 nm             | <i>Trametes versicolor</i>     | OR069616 |
| 63_197 | Radiata pine surface treated with titanium dioxide rutile 50 nm and coating  | <i>Aureobasidium pullulans</i> | OR069617 |
| 64_202 | Radiata pine surface treated with zinc oxide 80-200 nm and coating           | <i>Bjerkandera adusta</i>      | OR069618 |

|        |                                                                              |                                    |          |
|--------|------------------------------------------------------------------------------|------------------------------------|----------|
| 65_203 | Radiata pine surface with coating                                            | <i>Sydowia polyspora</i>           | OR069619 |
| 66_203 | Radiata pine surface with coating                                            | <i>Cladosporium sphaerospermum</i> | OR069620 |
| 67_203 | Radiata pine surface with coating                                            | <i>Aureobasidium pullulans</i>     | OR069621 |
| 71_204 | Radiata pine surface treated with titanium dioxide rutile 50 nm              | <i>Bjerkandera</i> sp.             | OR069622 |
| 74_204 | Radiata pine surface treated with titanium dioxide rutile 50 nm              | <i>Aureobasidium pullulans</i>     | OR069623 |
| 75_205 | Radiata pine surface treated with titanium dioxide rutile 50 nm              | <i>Valsa</i> sp.                   | OR069624 |
| 76_205 | Radiata pine surface treated with titanium dioxide rutile 100 nm and coating | <i>Sydowia polyspora</i>           | OR069625 |
| 77_205 | Radiata pine surface treated with titanium dioxide rutile 100 nm             | <i>Aureobasidium leucospermi</i>   | OR069626 |
| 79_205 | Radiata pine surface treated with titanium dioxide rutile 100 nm             | <i>Aureobasidium pullulans</i>     | OR069627 |
| 8_149  | Radiata pine surface treated with titanium dioxide rutile 100 nm             | <i>Aureobasidium melanogenum</i>   | OR069628 |
| 82_206 | Radiata pine surface treated with titanium dioxide anatase 40 nm             | <i>Aureobasidium</i> sp.           | OR069629 |
| 83_206 | Radiata pine surface treated with titanium dioxide anatase 40 nm             | <i>Aureobasidium pullulans</i>     | OR069630 |
| 84_206 | Radiata pine surface treated with titanium dioxide anatase 40 nm             | <i>Alternaria</i> sp.              | OR069631 |
| 86_206 | Radiata pine surface treated with titanium dioxide anatase 40 nm             | <i>Heterotruncatella</i> sp.       | OR069632 |
| 87_206 | Radiata pine surface treated with titanium dioxide anatase 40 nm             | <i>Ganoderma resinaceum</i>        | OR069633 |
| 89_207 | Radiata pine surface treated with titanium dioxide anatase 100 nm            | <i>Aureobasidium pullulans</i>     | OR069634 |
| 90_207 | Radiata pine surface treated with titanium dioxide anatase 100 nm            | <i>Sydowia polyspora</i>           | OR069635 |

|        |                                                                         |                                               |          |
|--------|-------------------------------------------------------------------------|-----------------------------------------------|----------|
| 93_207 | Radiata pine surface treated<br>with titanium dioxide<br>anatase 100 nm | <i>Burgella</i> sp.                           | OR069636 |
| 94_207 | Radiata pine surface treated<br>with titanium dioxide<br>anatase 100 nm | <i>Sistotrema</i> sp.                         | OR069637 |
| 95_207 | Radiata pine surface treated<br>with titanium dioxide<br>anatase 100 nm | <i>Armillaria</i> sp.                         | OR069638 |
| 97_208 | Radiata pine surface treated<br>with zinc oxide 35-45 nm                | <i>Aureobasidium</i><br><i>pullulans</i>      | OR069639 |
| 98_208 | Radiata pine surface treated<br>with zinc oxide 35-45 nm                | <i>Cladosporium</i><br><i>cladosporioides</i> | OR069640 |
| 99_208 | Radiata pine surface treated<br>with zinc oxide 35-45 nm                | <i>Cladosporium</i> sp.                       | OR069641 |
