# Supplementary material for: Fungal Colonization of Weathered Radiata Pine Surfaces Protected with Inorganic Nanoparticles and Coatings
Source: MDPI journal article supplement (doi:10.3390/f14071338), 2023-06-29
Supplement: s1 [file s1 › Table S3.pdf]

**Table S3: Analysis of variance Lightness change (Delta L)**

Variate: Delta\_L

| Source of variation   | d.f. | s.s.    | m.s.   | v.r. | F pr. |
|-----------------------|------|---------|--------|------|-------|
| Block stratum         | 2    | 74.429  | 37.214 | 4.69 |       |
| Block.*Units* stratum |      |         |        |      |       |
| convstrt              | 1    | 32.935  | 32.935 | 4.15 | 0.064 |
| convstrt.NP           | 5    | 29.332  | 5.866  | 0.74 | 0.608 |
| Residual              | 12   | 95.182  | 7.932  |      |       |
| Total                 | 20   | 231.878 |        |      |       |

## Tables of means

Variate: Delta\_L

Grand mean 13.65

|          |         |            |          |           |          |           |
|----------|---------|------------|----------|-----------|----------|-----------|
| convstrt | Control | Treated    |          |           |          |           |
|          | 16.71   | 13.14      |          |           |          |           |
| rep.     | 3       | 18         |          |           |          |           |
| convstrt | NP      | TiO2_A100  | TiO2_A40 | TiO2_R100 | TiO2_R50 | ZnO_35-45 |
| Treated  |         | 11.73      | 11.87    | 14.15     | 15.35    | 13.12     |
| convstrt | NP      | ZnO_80-200 | CTL      |           |          |           |
| Control  |         |            | 16.71    |           |          |           |
| Treated  |         | 12.60      |          |           |          |           |

## Standard errors of means

|        |          |          |         |
|--------|----------|----------|---------|
| Table  | convstrt | convstrt |         |
|        |          | NP       |         |
| rep.   | unequal  | 3        |         |
| d.f.   | 12       | 12       |         |
| e.s.e. | 1.626    | 1.626    | min.rep |
|        | 0.664    |          | max.rep |

## Standard errors of differences of means

|        |          |          |  |
|--------|----------|----------|--|
| Table  | convstrt | convstrt |  |
|        |          | NP       |  |
| rep.   | unequal  | 3        |  |
| d.f.   | 12       | 12       |  |
| s.e.d. | 1.756    | 2.300    |  |

Least significant differences of means (5% level)

| Table  | convstrt | convstrt |
|--------|----------|----------|
|        |          | NP       |
| rep.   | unequal  | 3        |
| d.f.   | 12       | 12       |
| l.s.d. | 3.827    | 5.010    |
