# Supplementary material for: Fungal Colonization of Weathered Radiata Pine Surfaces Protected with Inorganic Nanoparticles and Coatings
Source: MDPI journal article supplement (doi:10.3390/f14071338), 2023-06-29
Supplement: s1 [file s1 › Table S4.pdf]

## Table S4: Analysis of variance color change (Delta E)

Variate: Colour\_change

| Source of variation       | d.f. | s.s.     | m.s.    | v.r.  | F pr. |
|---------------------------|------|----------|---------|-------|-------|
| Replicate stratum         | 2    | 16.951   | 8.475   | 1.49  |       |
| Replicate.*Units* stratum |      |          |         |       |       |
| convstrt                  | 1    | 2.407    | 2.407   | 0.42  | 0.516 |
| convstrt.NP               | 5    | 128.518  | 25.704  | 4.52  | <.001 |
| convstrt.Coating          | 16   | 2272.044 | 142.003 | 25.00 | <.001 |
| convstrt.NP.Coating       | 40   | 297.328  | 7.433   | 1.31  | 0.134 |
| Residual                  | 124  | 704.434  | 5.681   |       |       |
| Total                     | 188  | 3421.681 |         |       |       |

## Tables of means

Variate: Colour\_change

Grand mean 9.32

|          |         |         |       |        |       |       |       |
|----------|---------|---------|-------|--------|-------|-------|-------|
| convstrt | Control | Treated |       |        |       |       |       |
|          | 9.05    | 9.37    |       |        |       |       |       |
| rep.     | 27      | 162     |       |        |       |       |       |
| convstrt | NP      | TiA100  | TiA40 | TiR100 | TiR50 | Un    | Zn35  |
| Control  |         |         |       |        |       | 9.05  |       |
| Treated  |         | 9.40    | 10.00 | 8.19   | 8.20  |       | 10.51 |
| convstrt | NP      | Zn80    |       |        |       |       |       |
| Treated  |         | 9.91    |       |        |       |       |       |
| convstrt | Coating | Cas     | Cer   | Cut    | Dan   | Ko    | Os    |
| Control  |         | 10.52   | 8.28  | 11.53  | 6.74  | 8.94  | 2.89  |
|          | rep.    | 3       | 3     | 3      | 3     | 3     | 3     |
| Treated  |         | 10.81   | 9.38  | 11.36  | 8.76  | 8.11  | 3.63  |
|          | rep.    | 18      | 18    | 18     | 18    | 18    | 18    |
| convstrt | Coating | Sip     | Tri   | Xyl    |       |       |       |
| Control  |         | 6.00    | 6.20  | 20.33  |       |       |       |
|          | rep.    | 3       | 3     | 3      |       |       |       |
| Treated  |         | 10.31   | 6.17  | 15.80  |       |       |       |
|          | rep.    | 18      | 18    | 18     |       |       |       |
| convstrt | NP      | Coating | Cas   | Cer    | Cut   | Dan   | Ko    |
| Control  | Un      |         | 10.52 | 8.28   | 11.53 | 6.74  | 8.94  |
| Treated  | TiA100  |         | 10.86 | 7.69   | 12.77 | 8.25  | 7.48  |
|          | TiA40   |         | 10.77 | 15.15  | 12.27 | 10.24 | 7.66  |
|          | TiR100  |         | 12.09 | 7.88   | 8.28  | 6.32  | 7.15  |
|          | TiR50   |         | 8.71  | 6.32   | 8.58  | 8.11  | 7.76  |
|          | Zn35    |         | 11.42 | 9.56   | 13.54 | 10.53 | 8.94  |
|          | Zn80    |         | 11.03 | 9.68   | 12.70 | 9.13  | 9.64  |

| convstrt | NP     | Coating | Os   | Sip   | Tri  | Xyl   |
|----------|--------|---------|------|-------|------|-------|
| Control  | Un     |         | 2.89 | 6.00  | 6.20 | 20.33 |
| Treated  | TiA100 |         | 4.43 | 11.95 | 4.67 | 16.54 |
|          | TiA40  |         | 2.64 | 9.01  | 6.82 | 15.42 |
|          | TiR100 |         | 2.00 | 7.33  | 4.52 | 18.16 |
|          | TiR50  |         | 2.87 | 11.04 | 6.41 | 13.99 |
|          | Zn35   |         | 5.29 | 11.48 | 8.28 | 15.57 |
|          | Zn80   |         | 4.57 | 11.06 | 6.29 | 15.12 |

## Standard errors of means

Table convstrt convstrt convstrt convstrt

|        |         | NP    | Coating | NP      |         |
|--------|---------|-------|---------|---------|---------|
|        |         |       |         | Coating |         |
| rep.   | unequal | 27    | unequal | 3       |         |
| d.f.   | 124     | 124   | 124     | 124     |         |
| e.s.e. | 0.459   | 0.459 | 1.376   | 1.376   | min.rep |
|        | 0.187   |       | 0.562   |         | max.rep |

## Standard errors of differences of means

| Table  | convstrt | convstrt<br>NP | convstrt<br>Coating | convstrt<br>NP<br>Coating |         |
|--------|----------|----------------|---------------------|---------------------------|---------|
| rep.   | unequal  | 27             | unequal             | 3                         |         |
| d.f.   | 124      | 124            | 124                 | 124                       |         |
| s.e.d. |          |                | 1.946               |                           | min.rep |
|        | 0.495    | 0.649          | 1.486               | 1.946                     | max-min |
|        |          |                | 0.794               |                           | max.rep |

## Least significant differences of means (5% level)

| Table  | convstrt | convstrt<br>NP | convstrt<br>Coating | convstrt<br>NP<br>Coating |         |
|--------|----------|----------------|---------------------|---------------------------|---------|
| rep.   | unequal  | 27             | unequal             | 3                         |         |
| d.f.   | 124      | 124            | 124                 | 124                       |         |
| l.s.d. |          |                | 3.852               |                           | min.rep |
|        | 0.981    | 1.284          | 2.942               | 3.852                     | max-min |
|        |          |                | 1.573               |                           | max.rep |
